# Supplementary material for: Electrospray deposition followed by laser-induced breakdown spectroscopy (ESD-LIBS): a new method for trace elemental analysis of aqueous samples
Source: Royal Society of Chemistry journal article supplement (doi:10.1039/c9ja00145j), 2019-01-01
Supplement: c9ja00145j1.pdf [file c9ja00145j1.pdf]

# Electrospray deposition followed by laser-induced breakdown spectroscopy (ESD-LIBS): a new method for trace elemental analysis in aqueous samples

L. Ripoll\* and M. Hidalgo\*

*Department of Analytical Chemistry and Food Science and University Materials Institute, University of Alicante, Apdo. 99, Alicante E-03080, Spain*

\* Corresponding authors. Tel.: +34 965903400 (Ext. 2421)

E-mail addresses: [montserrat.hidalgo@ua.es](mailto:montserrat.hidalgo@ua.es) (M. Hidalgo); [laura.ripoll@ua.es](mailto:laura.ripoll@ua.es) (L. Ripoll).

## Electronic supplementary information (ESI)

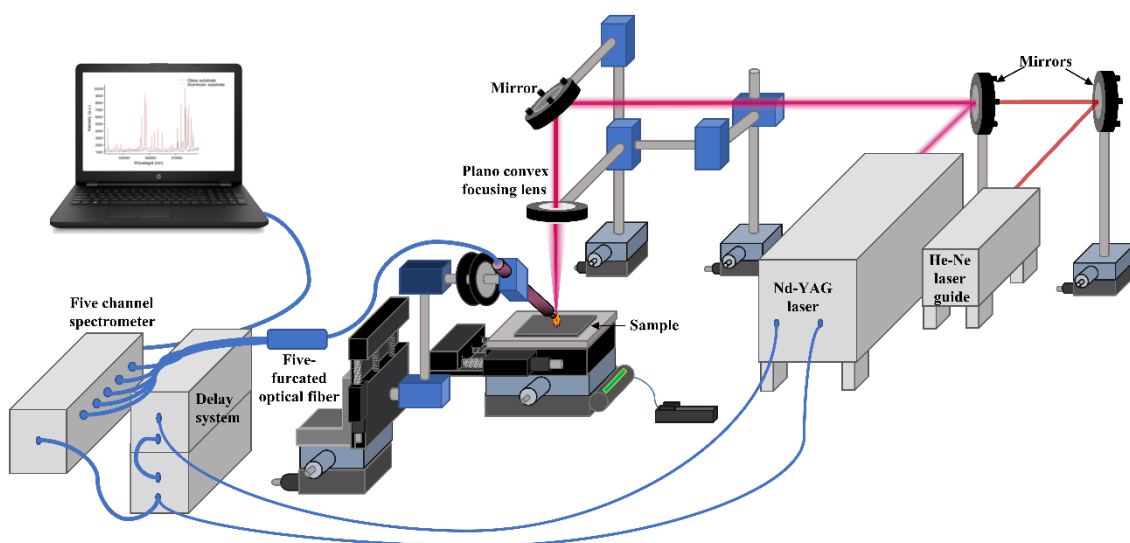

**Figure S1.** Scheme of the LIBS experimental setup

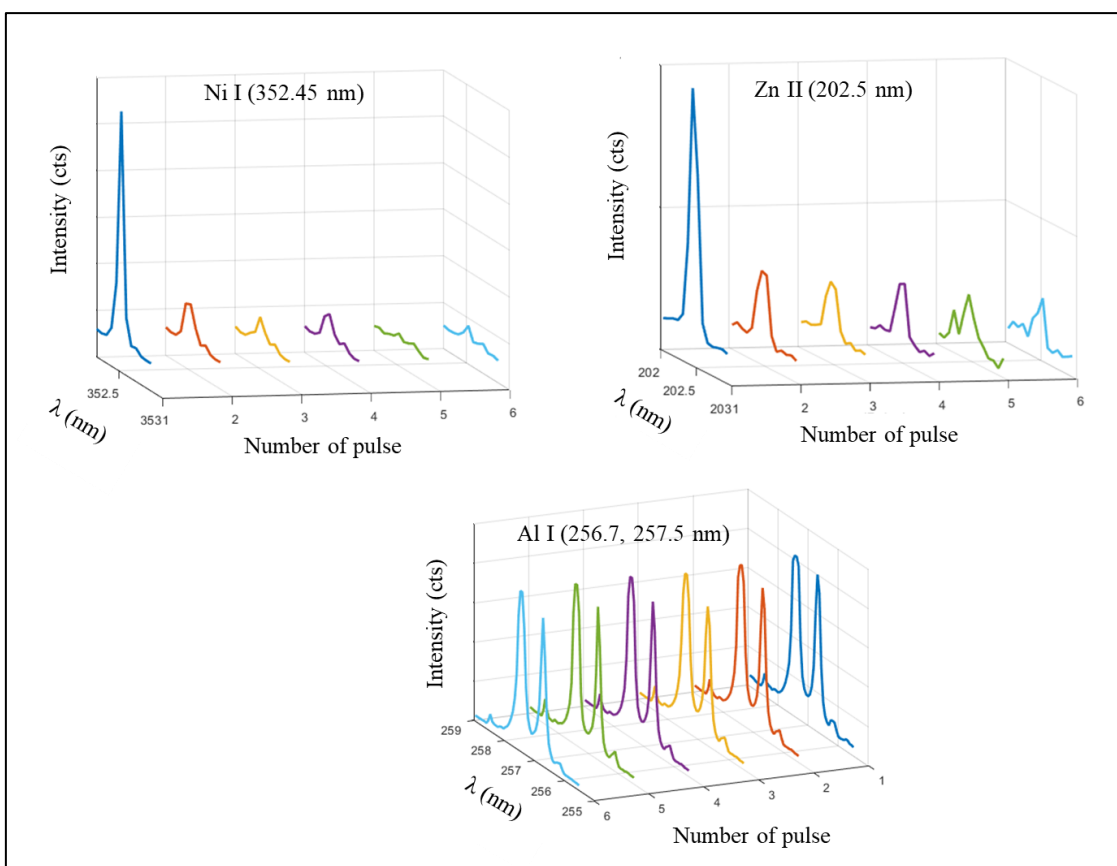

**Figure S2.** Emission intensity obtained for Ni, Zn and Al emission lines in the depth profiling analysis of a solid residue generated By ESD of a 0.5 mg kg<sup>-1</sup> concentration standard solution on an aluminium foil.

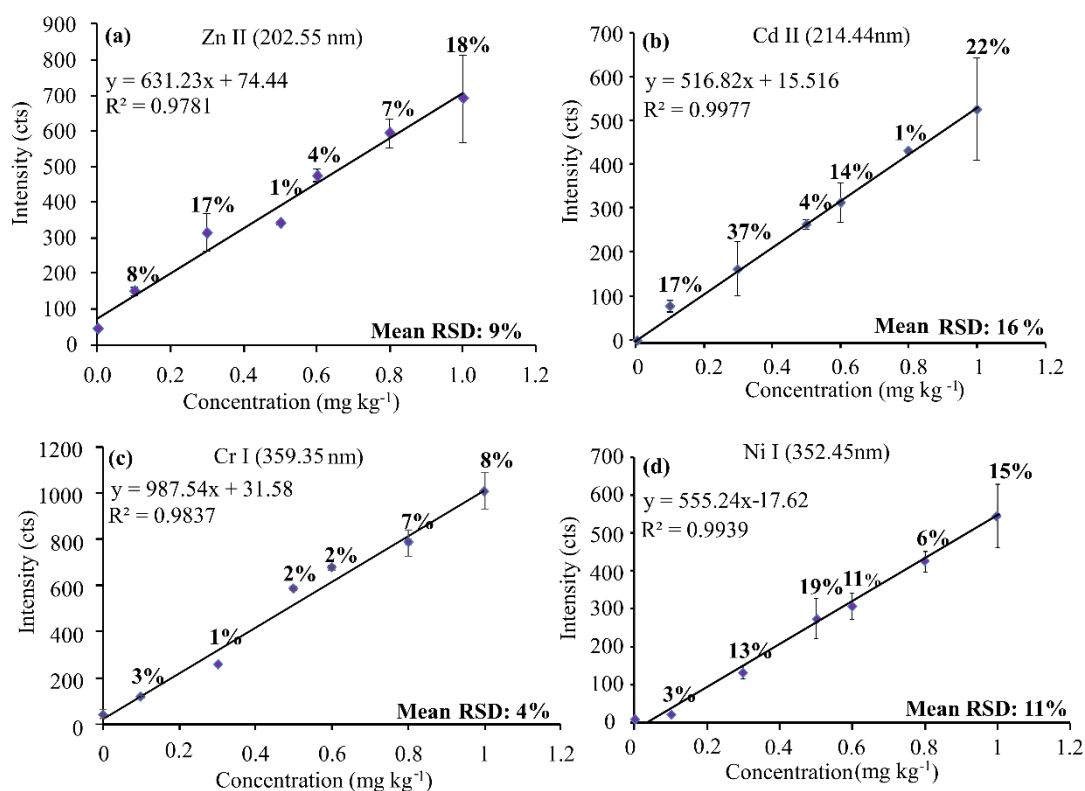

**Figure S3.** Calibration graphs obtained by ESD-LIBS with the use of the external calibration approach: (a) Zn II (202.55 nm), (b) Cd II (214.44 nm), (c) Cr I (359.35 nm) and (d) Ni I (352.45 nm). Error bars correspond to  $\pm$  one standard deviation (n=3). The corresponding % RSD values are also indicated in the vicinity of each data point.

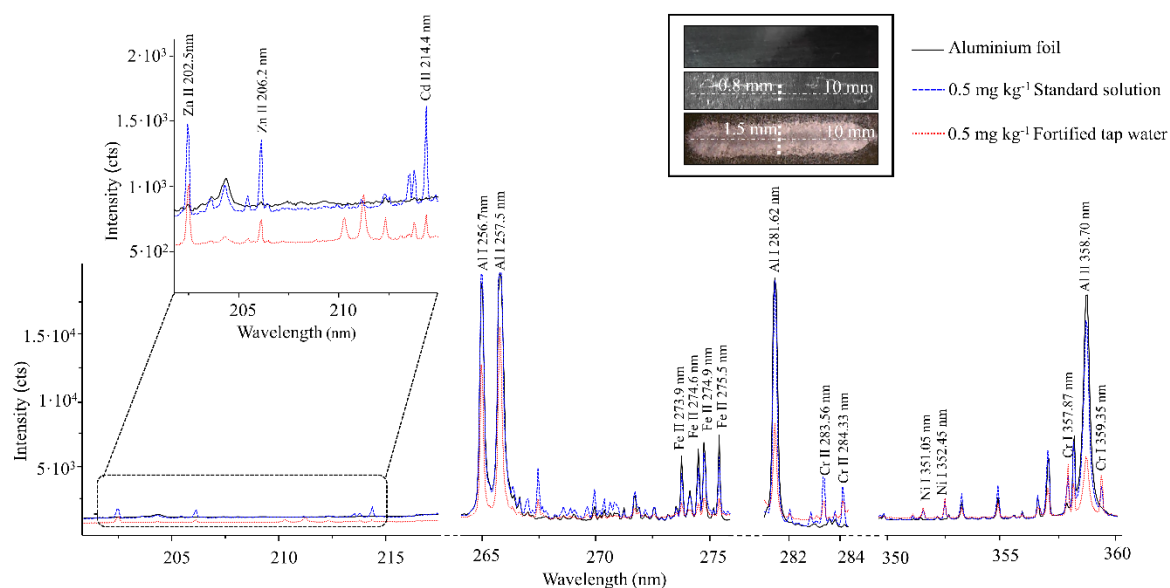

**Figure S4.** Analysis of: (black solid line) a blank (i.e., without solid residue) aluminium foil, (blue dashed line) a  $0.5 \text{ mg kg}^{-1}$  concentration standard solution residue on the aluminium foil and (red dotted line) a  $0.5 \text{ mg kg}^{-1}$  fortified tap water residue on the aluminium foil. Upper right inset: Photographs of the analysed aluminium foil, solid film obtained by ESD of the  $0.5 \text{ mg kg}^{-1}$  standard solution and solid film obtained by ESD of the  $0.5 \text{ mg kg}^{-1}$  fortified tap water sample.

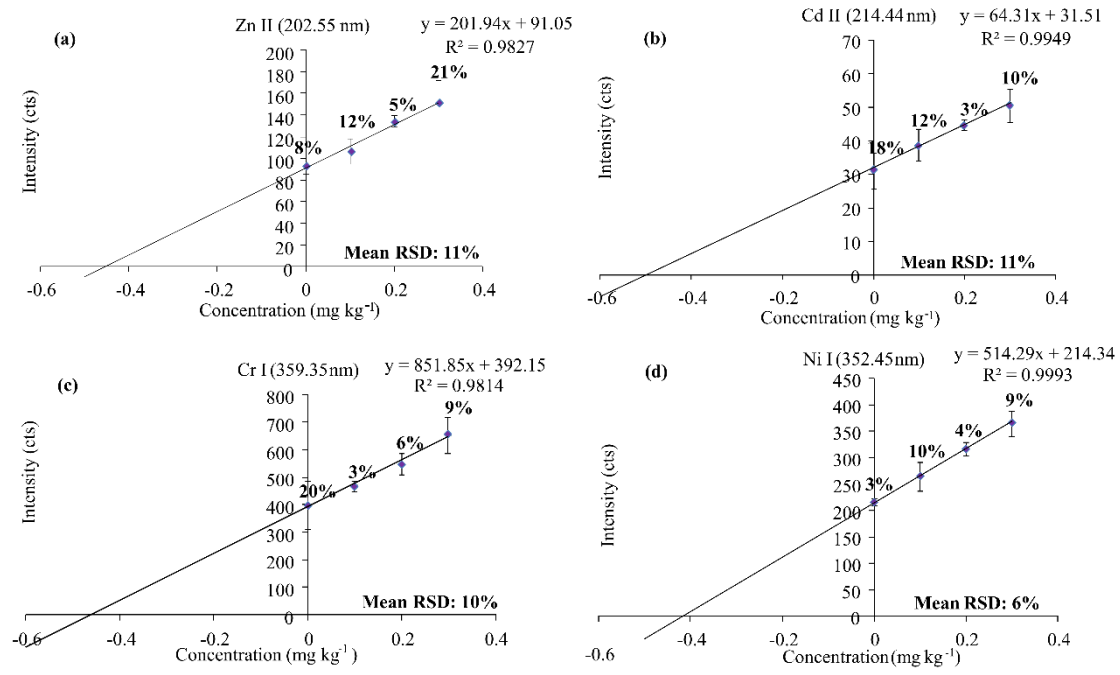

**Figure S5.** Mean of the three independent calibration graphs obtained by ESD-LIBS with the use of the conventional standard addition calibration approach: (a) Zn II (202.55 nm), (b) Cd II (214.44 nm), (c) Cr I (359.35 nm) and (d) Ni I (352.45 nm). Error bars correspond to  $\pm$  one standard deviation (n=3). The corresponding % RSD values are also indicated in the vicinity of each data point.

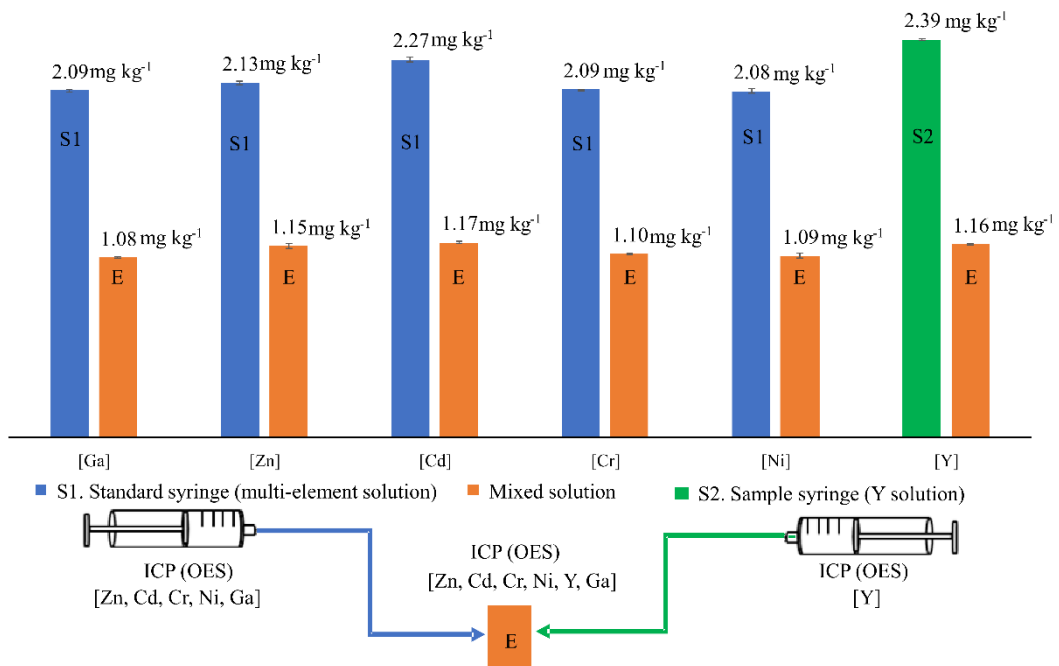

**Figure S6.** Results obtained in the calibration of the liquid feeding to the ESD system for on-line standard addition calibration procedure

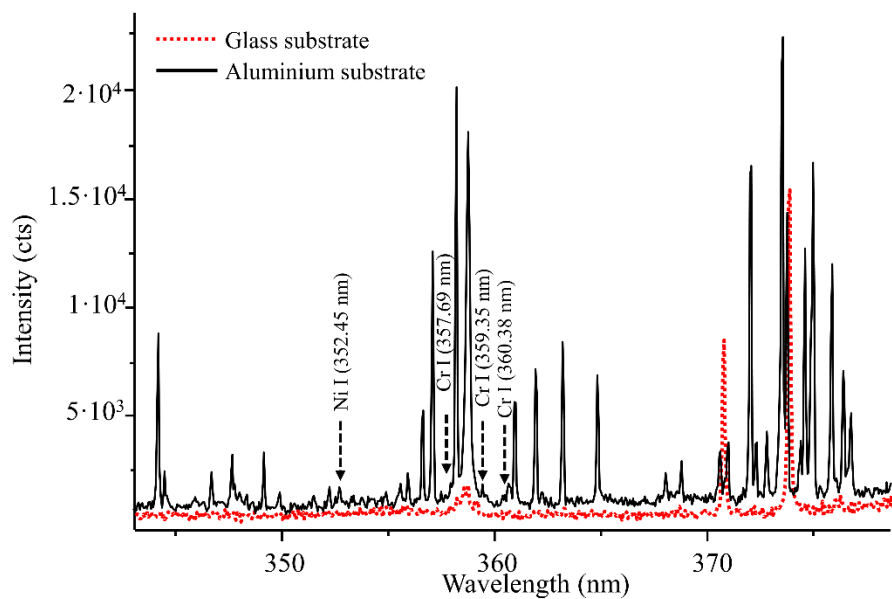

**Figure S7.** Emission spectra obtained from LIBS analysis of: (black solid line) an aluminum foil and (red dotted line) a glass slide. Arrows in the figure indicate the position of some Ni and Cr emission lines.

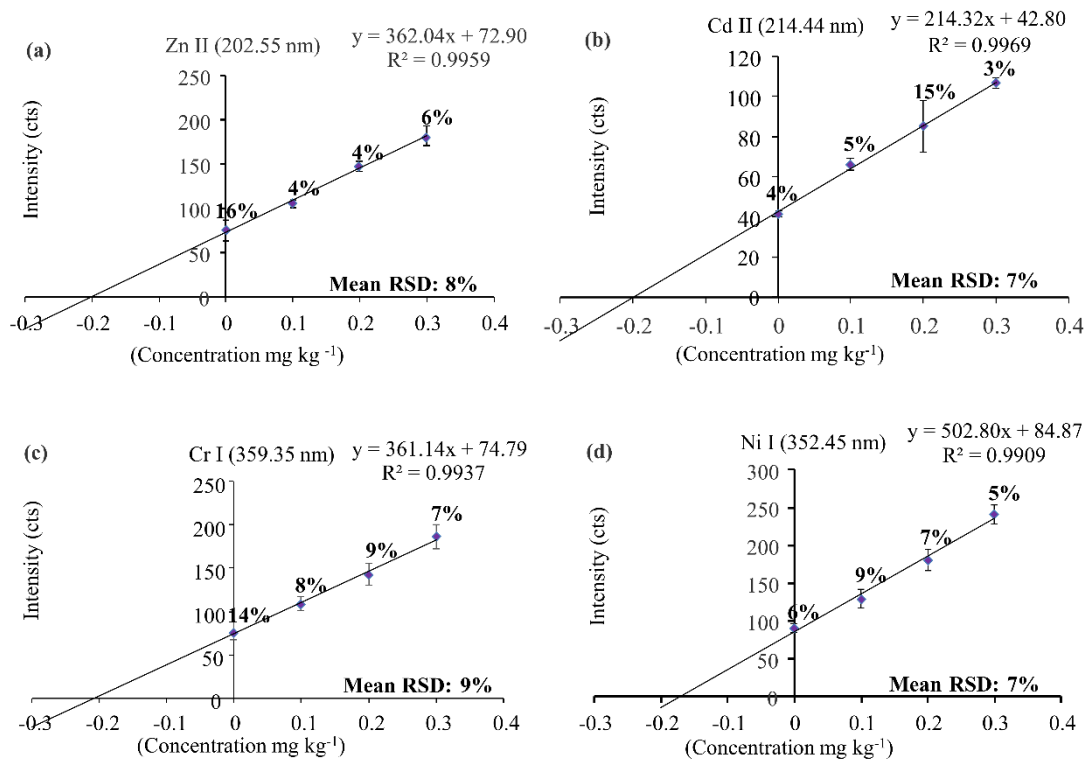

**Figure S8.** Mean of the three independent calibration graphs obtained by ESD-LIBS with the use of the on-line standard addition calibration approach: (a) Zn II (202.55 nm), (b) Cd II (214.44 nm), (c) Cr I (359.35 nm) and (d) Ni I (352.45 nm). Error bars correspond to  $\pm$  one standard deviation ( $n=3$ ). The corresponding % RSD values are also indicated in the vicinity of each data point.
